# Supplementary material
Source: publisher figshare collection journal article supplement (https://asha.figshare.com/articles/dataset/_/14347550)
Supplement: Supplementary file 1 [file 1]

## Supplemental Material S2.

| Cohesion Relations (Examples)                     |                                                                                                                                                                                                         |                                                                                                                                                                                                           |                                                                                                                                                                                                                                                                                                                                                                                                                                                                                                                       |
|---------------------------------------------------|---------------------------------------------------------------------------------------------------------------------------------------------------------------------------------------------------------|-----------------------------------------------------------------------------------------------------------------------------------------------------------------------------------------------------------|-----------------------------------------------------------------------------------------------------------------------------------------------------------------------------------------------------------------------------------------------------------------------------------------------------------------------------------------------------------------------------------------------------------------------------------------------------------------------------------------------------------------------|
| Participant                                       | Brazilian Portuguese                                                                                                                                                                                    | English                                                                                                                                                                                                   | Explanations                                                                                                                                                                                                                                                                                                                                                                                                                                                                                                          |
| <b>RH210 (participant right hemisphere # 210)</b> | <i>essa historinha aqui/<br/>é de uma mãe/<br/>é meio distraída/<br/>saíu com as criança/<br/>estacionou em algum lugar/<br/>saíu pra fazer qualquer coisa/<br/>e deixou as criança dentro do carro</i> | this story here/<br>is about a mother/<br>who is a little distracted/<br>she went out with <b>the children</b> /<br>parked somewhere/<br>went out to do something and left <b>the children</b> in the car | This is an example of <b>reiteration</b> through <b>repetition</b> - repetition is necessary for reference, avoiding ambiguity                                                                                                                                                                                                                                                                                                                                                                                        |
| <b>PLH6 (participant left hemisphere # 6)</b>     | <i>guri* achou o cachorro na rua/<br/>Ø levou Ø para casa</i>                                                                                                                                           | boy found the dog on the street/<br>Ø took Ø home                                                                                                                                                         | In this example, the symbol Ø represents an ellipsis. According to Antunes (2005), an ellipsis is a type of referencing. In Portuguese, the subject, or even the object in certain circumstances, does not have to be repeated. In this example, an English speaker would have said ‘ <b>the boy took the dog home</b> ’. In Portuguese, the pronoun <i>ele</i> ( <b>he</b> ) would have been used in both cases and would not have resolved the ambiguity: ‘ <b>ele</b> levou <b>ele</b> para casa’ (in Portuguese). |
| <b>PLH 7 (participant left hemisphere # 7)</b>    | <i>ele viu um cachorrinho.../<br/>vira-lata de cachorro de rua/<br/>ele gosta muito de cachorro</i>                                                                                                     | <i>he saw a puppy ... /<br/>a stray dog /<br/>he likes dogs a lot</i>                                                                                                                                     | In this case, the pronoun <b>he</b> - which refers to the boy in the story - does not have a reference. The pronoun does not have a reference, which we call a textual cohesion error.                                                                                                                                                                                                                                                                                                                                |
| <b>RH205 (participant right hemisphere # 205)</b> | <i>deve tá pedindo pra mãe deixar o cachorro dentro de casa</i>                                                                                                                                         | <i>must be asking the mother to leave the dog inside the house</i>                                                                                                                                        | A cohesion error is produced in this case because the subject ( <b>the boy</b> ) is missing. In other cases, the subject can be easily taken up by the context, but this was not the case in this example.                                                                                                                                                                                                                                                                                                            |

\* Expression used in southern Brazil, synonymous of young boy
