# Supplementary material
Source: publisher figshare collection journal article supplement (https://asha.figshare.com/articles/dataset/_/14347550)
Supplement: Supplementary file 2 [file 1]

## Supplemental Material S1.

### Macropropositions of narratives

| The dog story (Le Boeuf, 1976)                                                                                          |              |
|-------------------------------------------------------------------------------------------------------------------------|--------------|
| A boy sees a dog (lost puppy) on the street / sidewalk                                                                  | scenario     |
| The boy takes (decides to take) the dog home                                                                            | scenario     |
| The boy hides the dog in the wardrobe/closet                                                                            | scenario     |
| The mother finds the dog                                                                                                | complication |
| The mother asks the boy for some explanations / The boy begs the mother to keep the dog                                 | complication |
| The mother allows the boy to keep the dog / The mother helps the child/the boy builds the dog house                     | resolution   |
| The car accident (Joanette et al., 1995)                                                                                |              |
| A woman/mother drives the car and takes two children/her two children                                                   | scenario     |
| The woman/mother parks the car/goes to an establishment and leaves the two children (the two small children) in the car | scenario     |
| The boy gets into the driver's seat and moves the steering/lever of the car                                             | complication |
| The car goes down the slope and hits a lamppost                                                                         | complication |
| The woman/mother leaves the establishment and realizes what happened                                                    | resolution   |
| The cat story (Ulatowska, Doyel, Stern, Haynes, & North, 1983)                                                          |              |
| A girl/a daughter cries and asks a man/father for help because a cat/his cat is stuck on the branch of a tree           | scenario     |
| The man/father climbs the tree to remove the cat                                                                        | scenario     |
| The man / father leans on the branch and reaches the cat                                                                | complication |
| The man/father throws the cat from the tree towards the girl (the cat jumps towards the girl)                           | complication |
| The man / father gets stuck on the branch by his jacket and a fireman comes to rescue him                               | resolution   |
